# Supplementary material for: Gadolinium-labelled iron/iron oxide core/shell nanoparticles as T1–T2 contrast agent for magnetic resonance imaging
Source: Royal Society of Chemistry journal article supplement (doi:10.1039/c8ra04530e), 2018-01-01
Supplement: c8ra04530e1.pdf [file c8ra04530e1.pdf]

## Supporting Information

### Gadolinium-labelled iron/iron oxide core/shell nanoparticles as $T_1$ - $T_2$ Contrast Agent for Magnetic Resonance Imaging

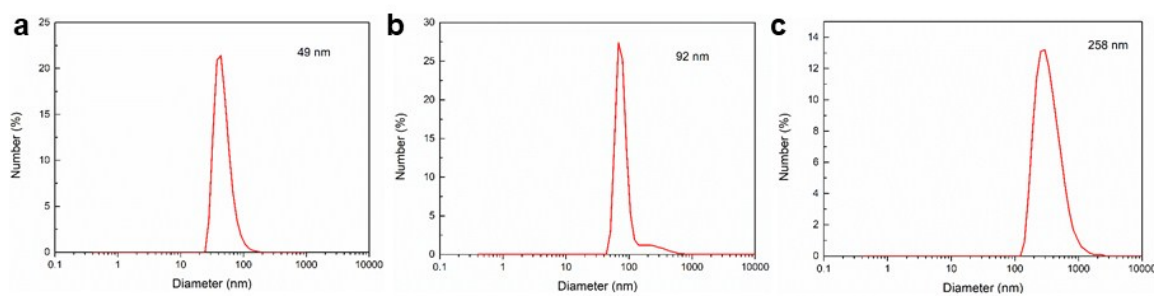

**Figure S1.** The hydrodynamic diameter of a) ALA coated Fe@Fe<sub>3</sub>O<sub>4</sub>, b) DOTA-Fe@Fe<sub>3</sub>O<sub>4</sub> and c) DOTA(Gd)-Fe@Fe<sub>3</sub>O<sub>4</sub> NPs, respectively.

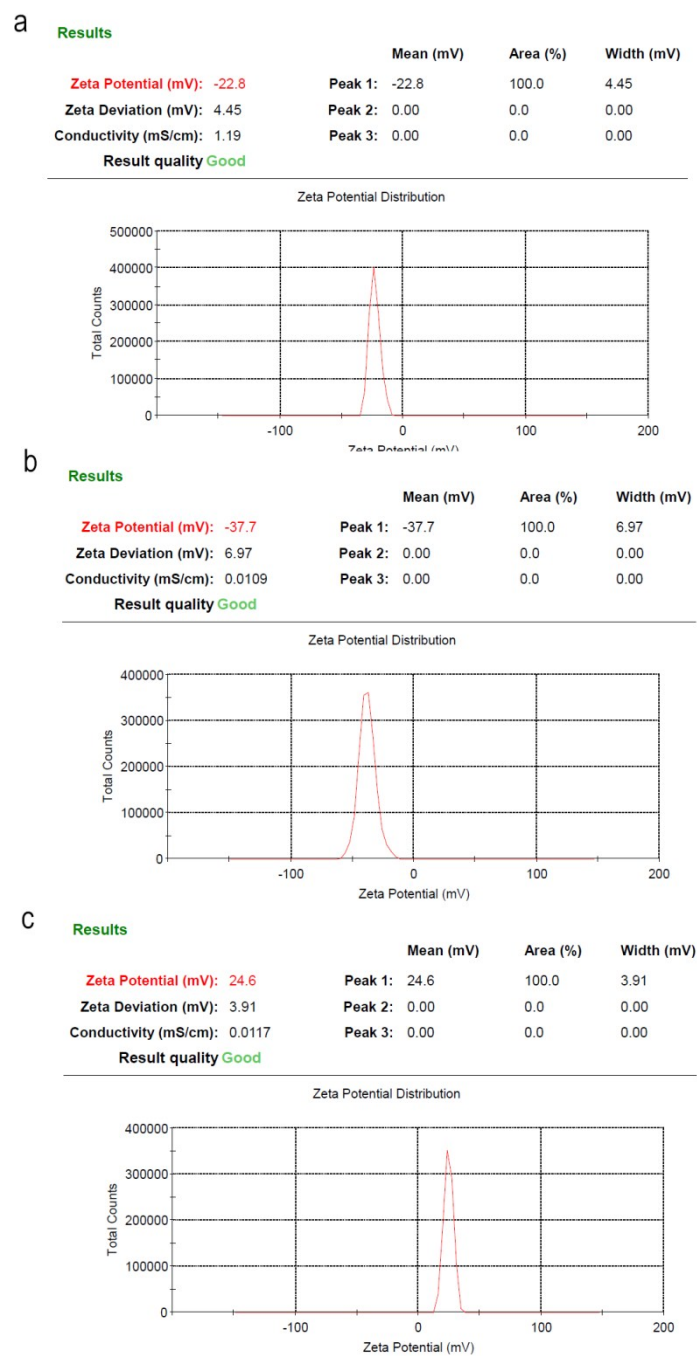

**Figure S2.** Zeta potentials of a) ALA coated Fe@Fe<sub>3</sub>O<sub>4</sub>, b) DOTA-Fe@Fe<sub>3</sub>O<sub>4</sub> and c) DOTA(Gd)-Fe@Fe<sub>3</sub>O<sub>4</sub> NPs, respectively.

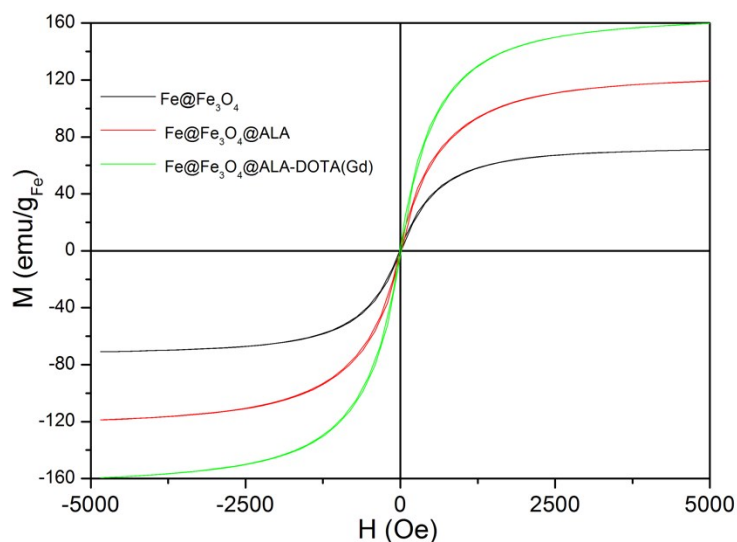

**Figure S3.** Magnetization curves of bcc-Fe/Fe<sub>3</sub>O<sub>4</sub> (black line), ALA coated Fe@Fe<sub>3</sub>O<sub>4</sub> (red line), DOTA(Gd)-Fe@Fe<sub>3</sub>O<sub>4</sub> (green line) based on the terms of per gram Fe.

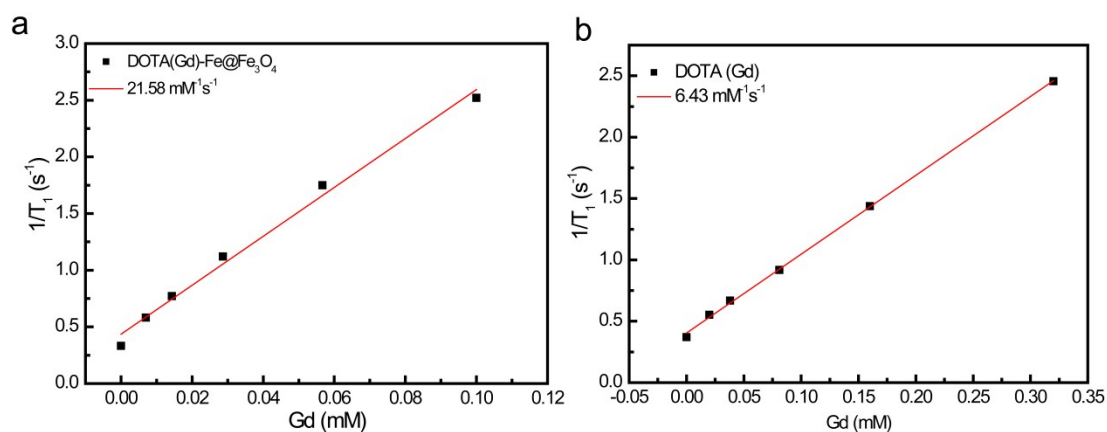

**Figure S4.**  $r_1$  relaxation rates of a) DOTA(Gd)-Fe@Fe<sub>3</sub>O<sub>4</sub> NPs and b) DOTA(Gd) measured at various Gd concentrations with a 0.5 T system.

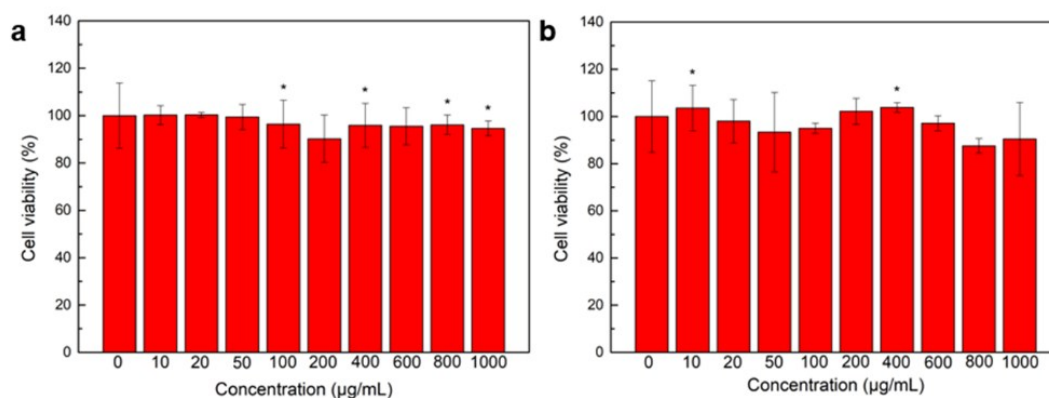

**Figure S5.** The viability of a) 4T1 and b) HUVEC cell lines incubated with DOTA(Gd)-Fe@Fe<sub>3</sub>O<sub>4</sub> NPs with different concentrations for 24 h at 37 °C, respectively (\* $p < 0.05$ ,  $n = 3$ ).
